# Supplementary material
Source: Springer Nature journal article supplement (https://www.springermedizin.de/resource/supplementary/13019_2010_359_MOESM2_ESM.pdf/9638208)

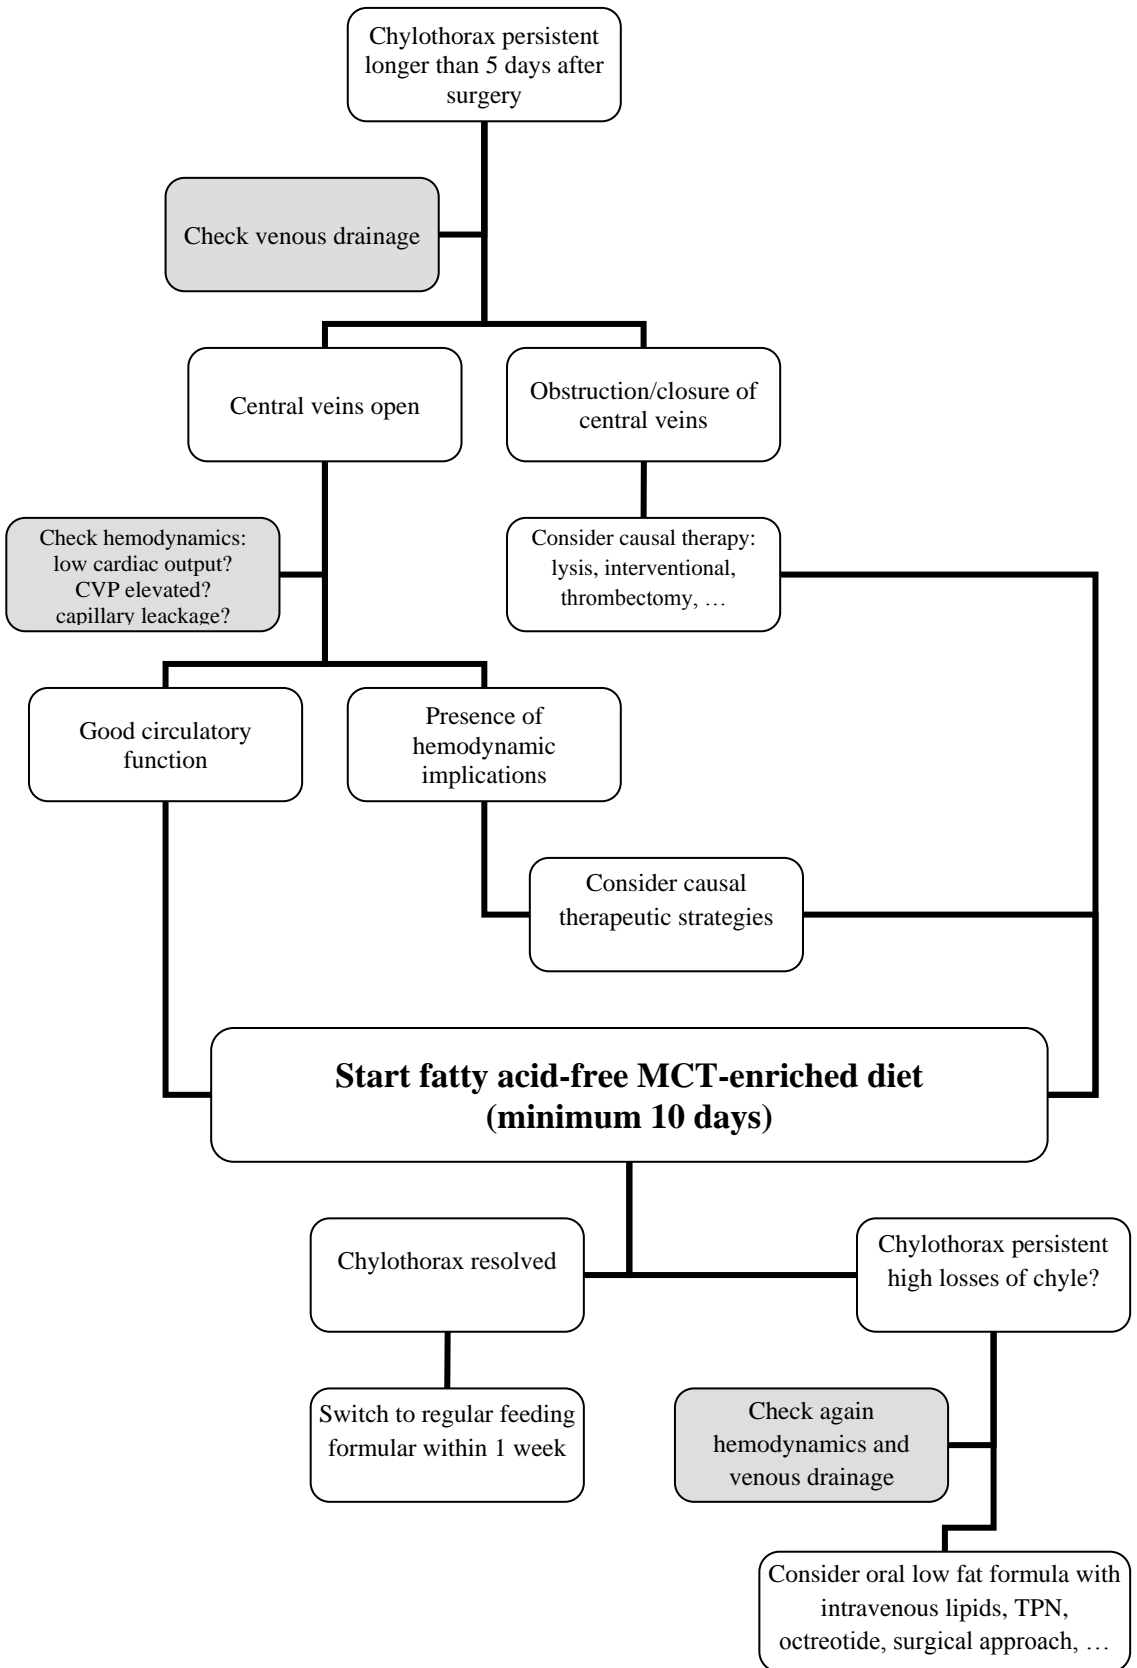

Supplement: MOESM2 [file 9638208]
